# Supplementary material for: Comparing TIMP-1 and Hsp70 in Blood and Saliva as Potential Prognostic Markers in HNSCC
Source: MDPI journal article supplement (doi:10.3390/biomedicines10123225), 2022-12-12
Supplement: s1 [file s1]

**Supplementary Table S1.** (a) Table of relative standard deviation of marker concentration in HNSCC patients, control subjects without infection with at least 2 samples per material (b) Table of the subgroup with head and neck infections ( $n=15$ ) and their diagnosis of infection at time of sample collection. Localization specified for the different types of infections. (c) R-packages used for statistical analysis and visualization.

| Variable                                 | TIMP-1 serum | TIMP-1 saliva | Hsp70 serum | Hsp70 saliva |
|------------------------------------------|--------------|---------------|-------------|--------------|
| Per Patient ( $n=29$ , $\geq 2$ samples) | 21.9%        | 56.5%         | 88.5%       | 81.4%        |
| HNSCC patients ( $n=52$ )                | 37.5%        | 68.5%         | 182.7%      | 142.2%       |
| Subjects without infection ( $n=25$ )    | 19.8%        | 70.1%         | 123.5%      | 97.8%        |

(a)

| Diagnosis of subgroups with infections | localization                          | number = n |
|----------------------------------------|---------------------------------------|------------|
| abscess                                | peritonsilliar, tongue, jaw ( $n=2$ ) | 4          |
| purulent sialadenitis                  | salivary gland                        | 1          |
| erysipelas                             | temporal scalp                        | 1          |
| laryngitis                             | larynx                                | 2          |
| osteonecrosis                          | lower jaw ( $n=2$ )                   | 2          |
| cellulitis                             | orbital, base of the mouth            | 2          |
| sinusitis                              | paranasal sinus                       | 1          |
| tonsillitis                            | tonsills                              | 2          |

(b)

| R-packages                                   |
|----------------------------------------------|
| datasets, car, pacman                        |
| tidyverse, dplyr                             |
| psych, survival, survminer                   |
| ggplot2, ggthemes, ggrepel, ggsignif, ggpubr |
| pROC, gridExtra, finalfit                    |
| gtsummary, devtools                          |

(c)

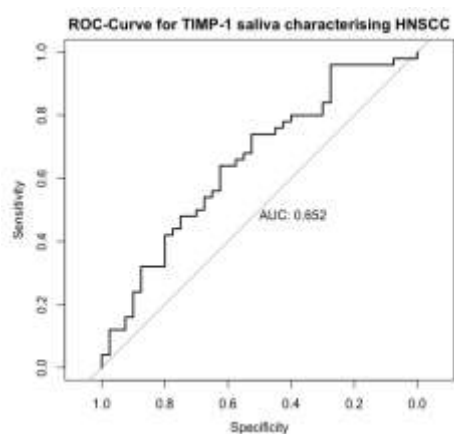

(a)

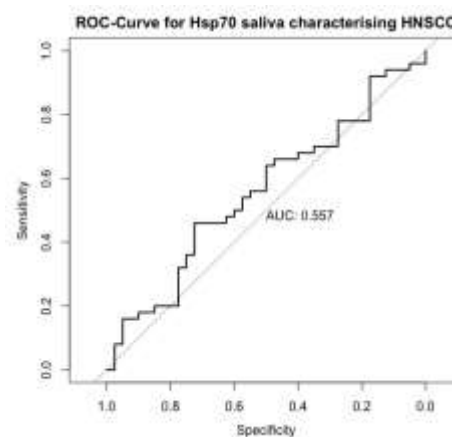

(b)

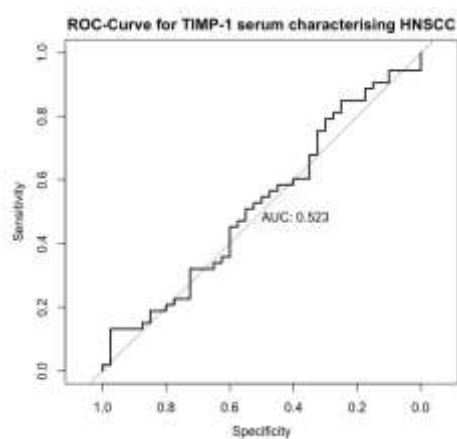

(b)

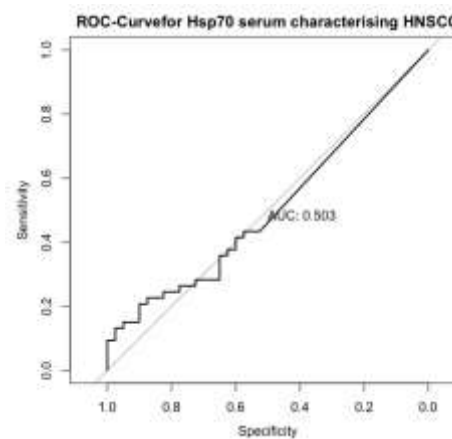

(d)

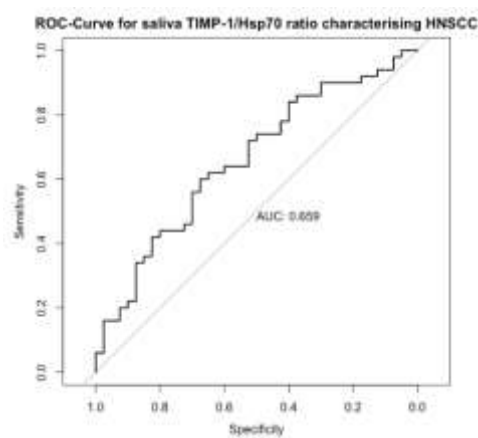

(e)

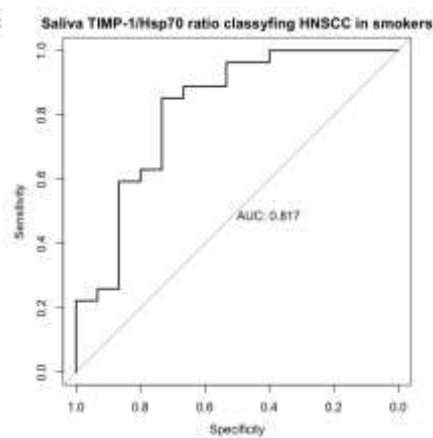

(f)

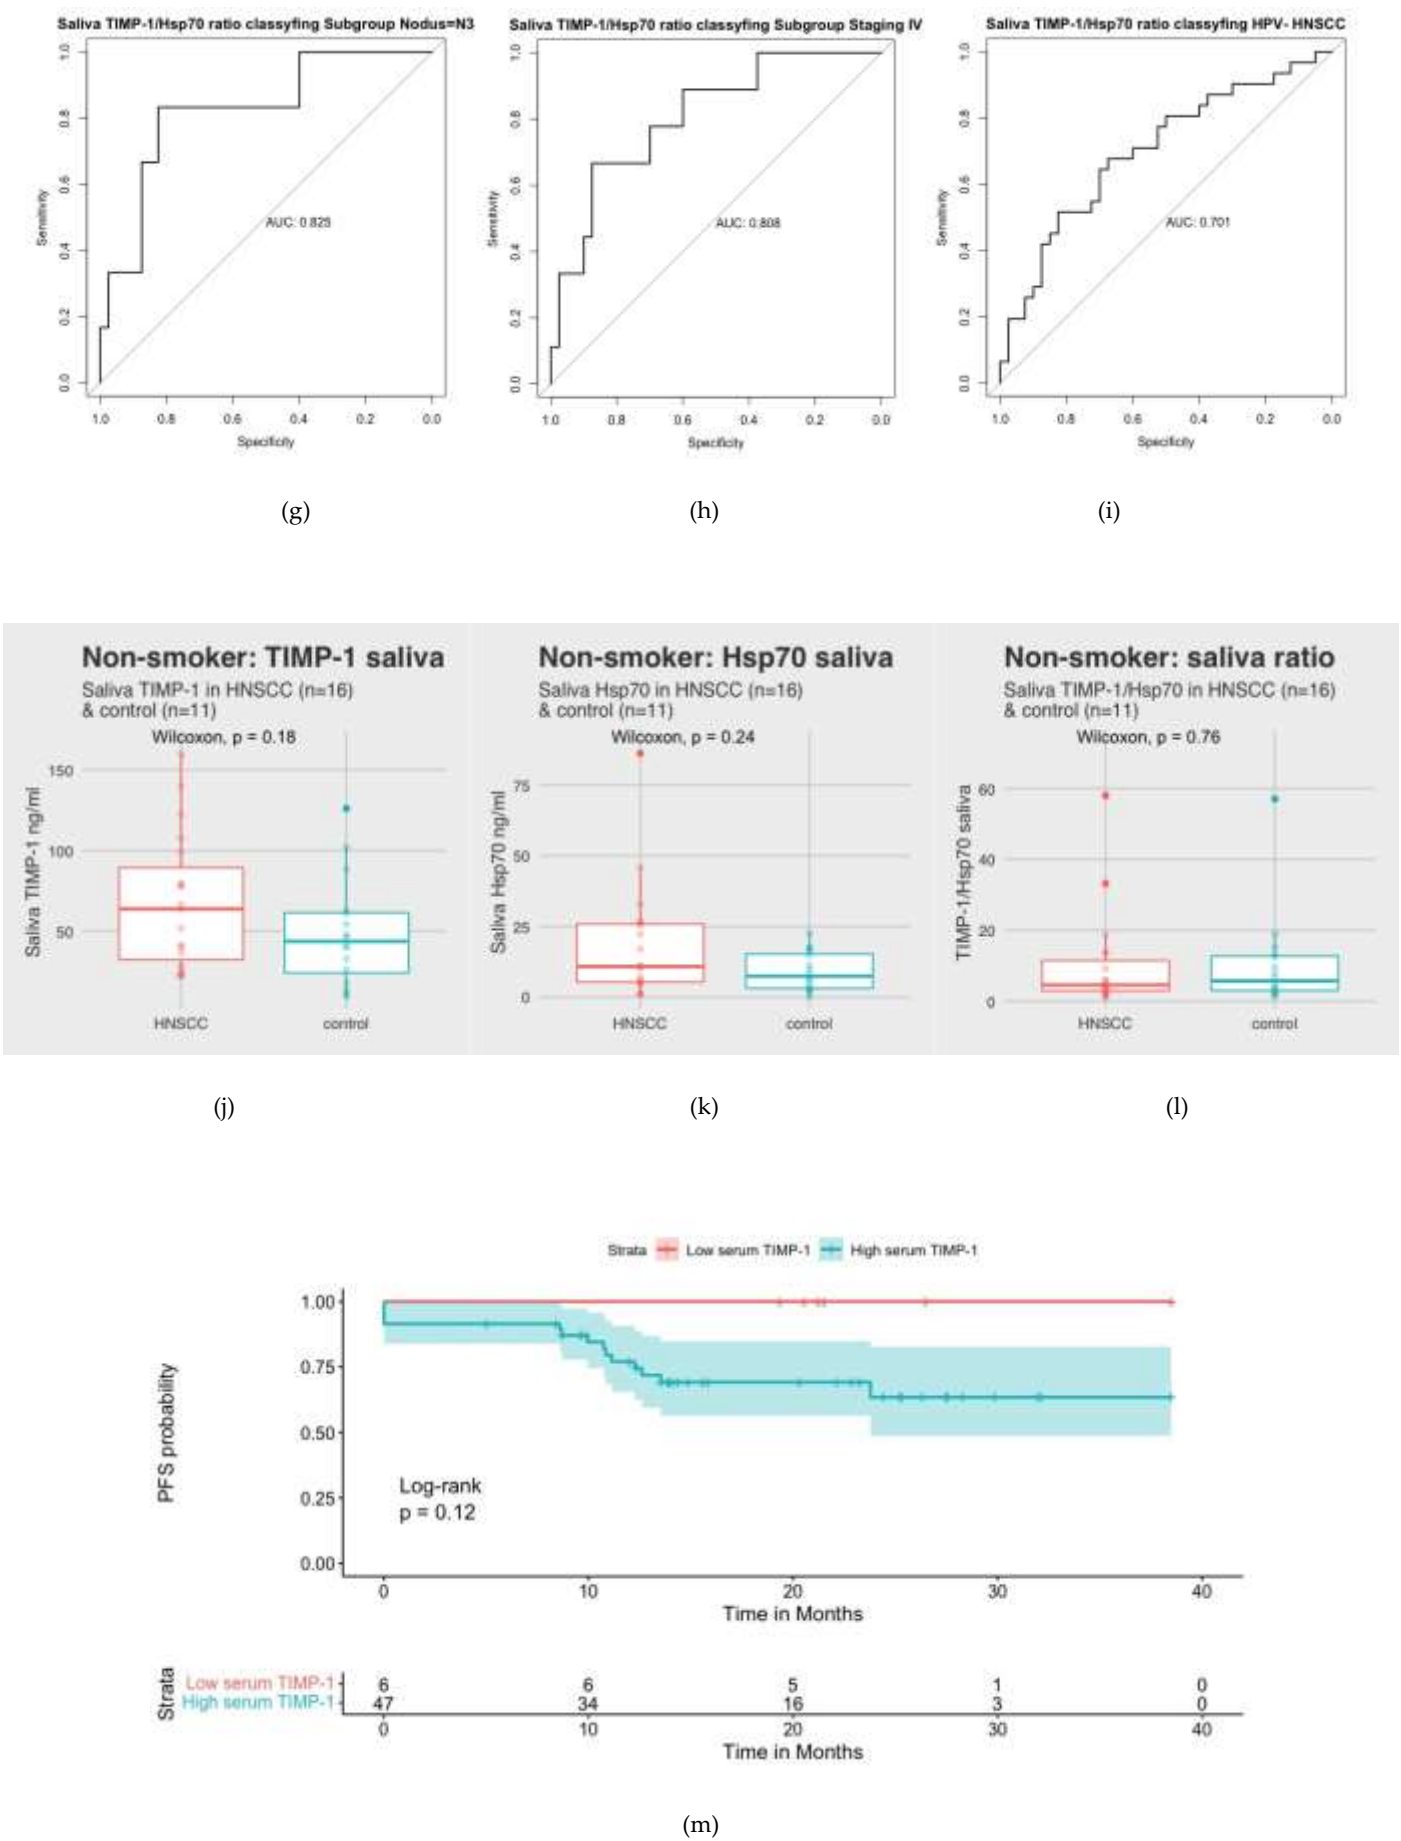

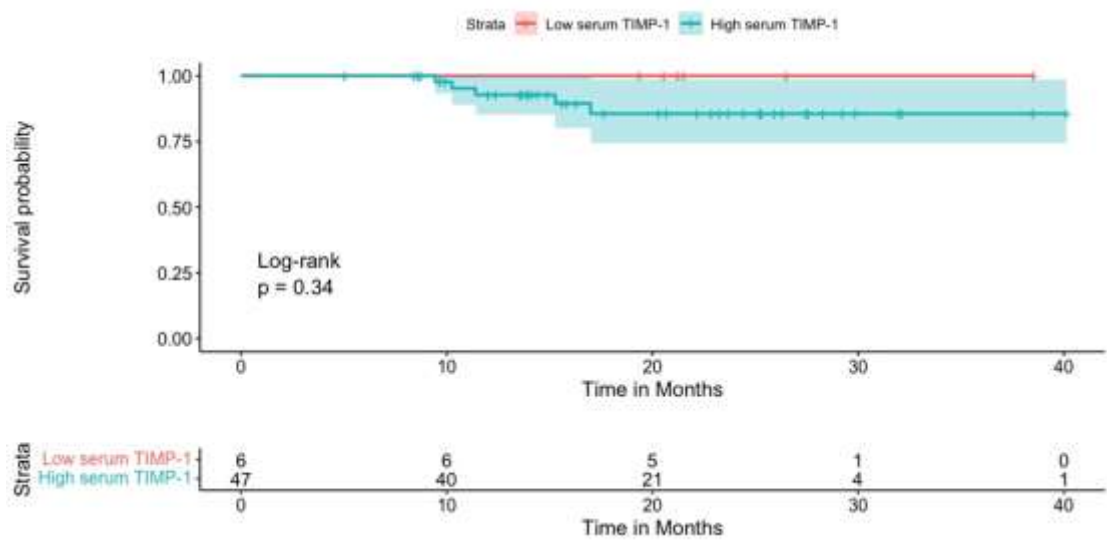

(n)

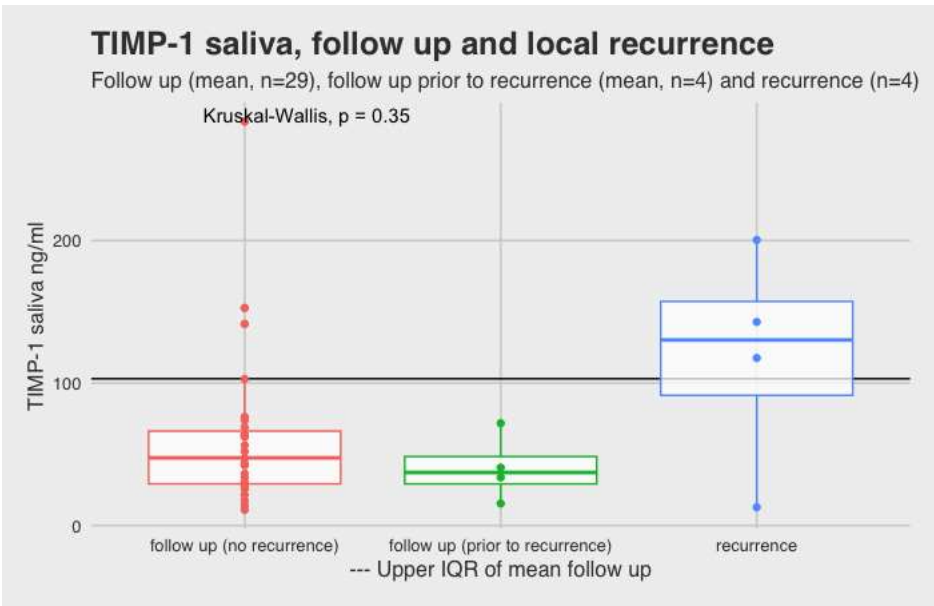

(o)

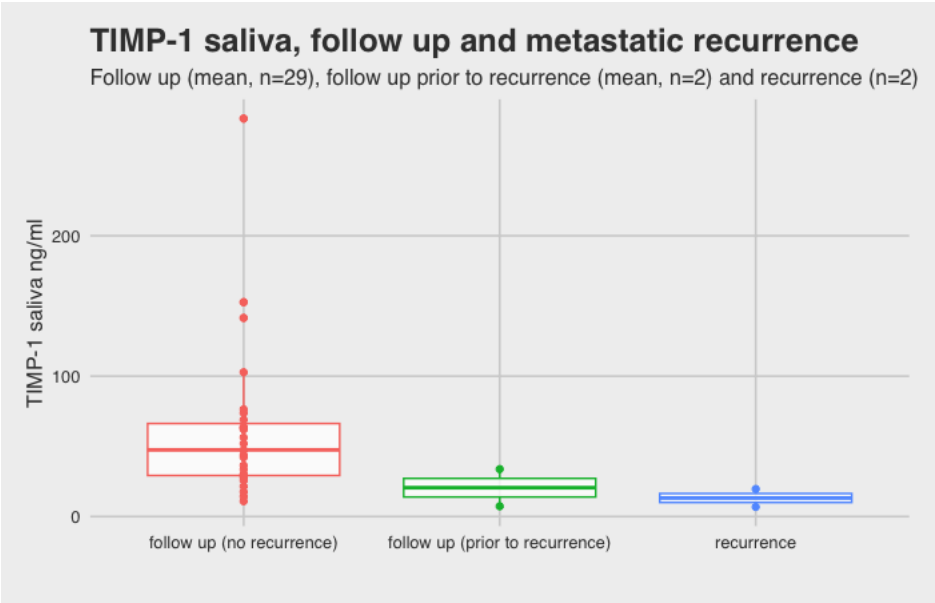

(p)

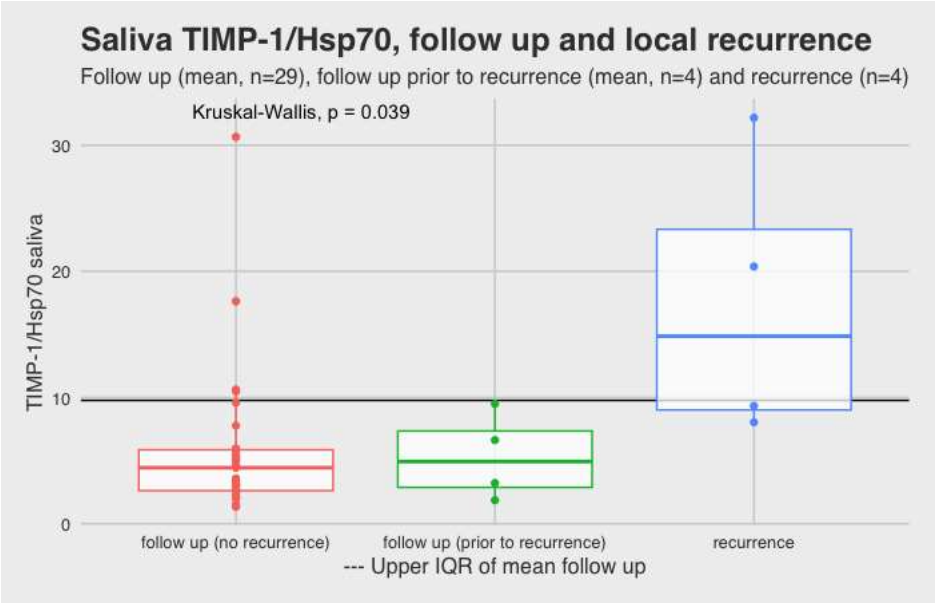

(q)

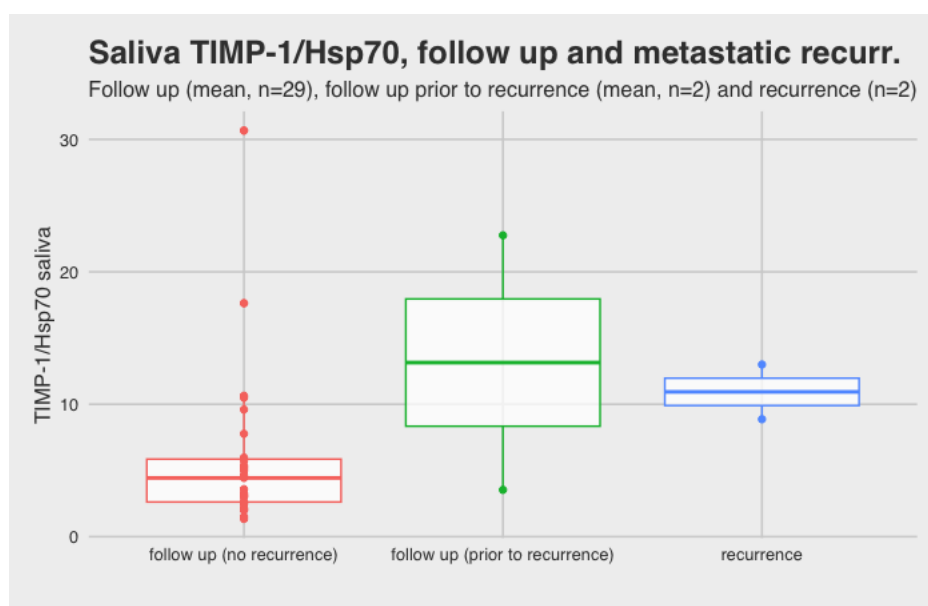

(r)

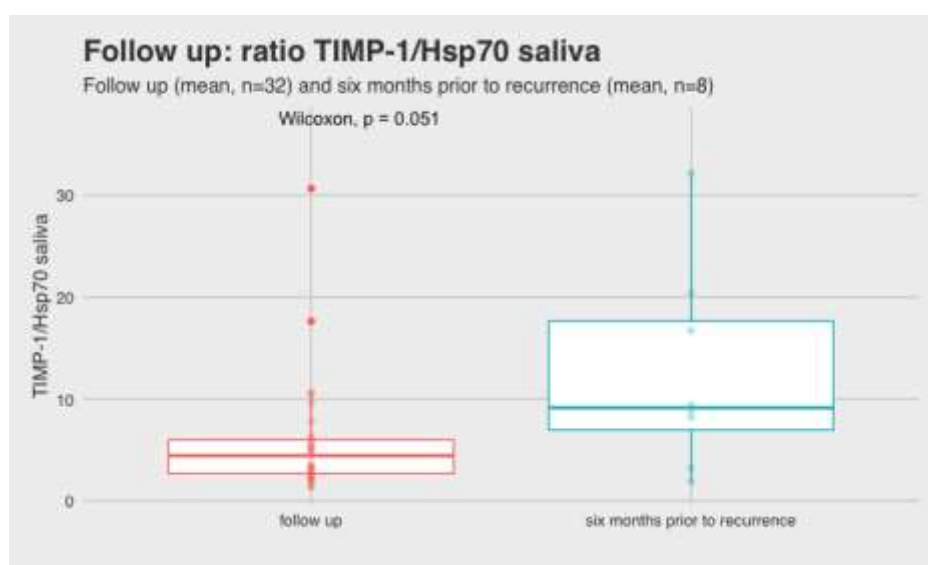

(s)

**Supplementary Figure S1.** (a) Receiver operator characteristic curve for saliva TIMP-1 classifying HNSCC patients ( $n=53$ ) and control subjects ( $n=40$ ), (b) Receiver operator characteristic curve for saliva Hsp70 classifying HNSCC patients ( $n=53$ ) and control subjects ( $n=40$ ), (c) Receiver operator characteristic curve for serum TIMP-1 classifying HNSCC patients ( $n=53$ ) and control subjects ( $n=40$ ), (d) Receiver operator characteristic curve for serum Hsp70 classifying HNSCC patients ( $n=53$ ) and control subjects ( $n=40$ ), (e) Receiver operator characteristic curve for TIMP-1/Hsp70 saliva ratio classifying HNSCC patients ( $n=53$ ) and control subjects ( $n=40$ ), (f) Receiver operator characteristic curve for TIMP-1/Hsp70 saliva ratio classifying HNSCC patients in smoker subgroup with smokers with HNSCC ( $n=28$ ) & smokers control ( $n=15$ ) (g) Receiver operator characteristic curve for TIMP-1/Hsp70 saliva ratio classifying HNSCC patients in a subgroup with Nodus state N3 ( $n=6$ ) & control ( $n=40$ ), (h) Receiver operator characteristic curve for TIMP-1/Hsp70 saliva ratio classifying HNSCC patients in a subgroup with UICC Stage IV ( $n=6$ ) & control ( $n=40$ ), (i)

Receiver operator characteristic curve for TIMP-1/Hsp70 saliva ratio classifying HNSCC patients in a subgroup with HPV negative ( $n=34$ ) & control ( $n=40$ ), (j) Saliva ratio TIMP-1 in non-smoking subjects, comparing HNSCC and the combined control group, (k) Saliva ratio Hsp70 in non-smoking subjects, comparing HNSCC and the combined control group, (l) Saliva ratio TIMP-1/Hsp70 in non-smoking subjects, comparing HNSCC and the combined control group, (m) PFS probability for TIMP-1 concentration above (high) and below (low) cut off value 196ng/ml, (n) OS probability for TIMP-1 concentration above (high) and below (low) cut off value 196ng/ml, (o) Saliva TIMP-1 concentration mean during follow up, follow up before local recurrence and concentration at diagnosis of local recurrence, (p) Saliva TIMP-1/Hsp70 ratio mean during follow up, follow up before local recurrence and at diagnosis of local recurrence, (q) Saliva TIMP-1/Hsp70 ratio mean during follow up, follow up before metastatic recurrence and concentration at diagnosis of metastatic recurrence, (r) Saliva TIMP-1/Hsp70 ratio mean in follow up, follow up before metastatic recurrence and concentration at diagnosis of metastatic recurrence, (s) TIMP-1/Hsp70 saliva ratio mean during follow up and mean six months prior to recurrence
